# Supplementary figures and images for: Identification of tumor immune infiltration-associated lncRNAs for improving prognosis and immunotherapy response of patients with non-small cell lung cancer
Source: PubMed Central journal article supplement — J Immunother Cancer. 2020 Feb 10;8(1):e000110. doi: 10.1136/jitc-2019-000110 (PMC7057423; doi:10.1136/jitc-2019-000110), 2020-02-10

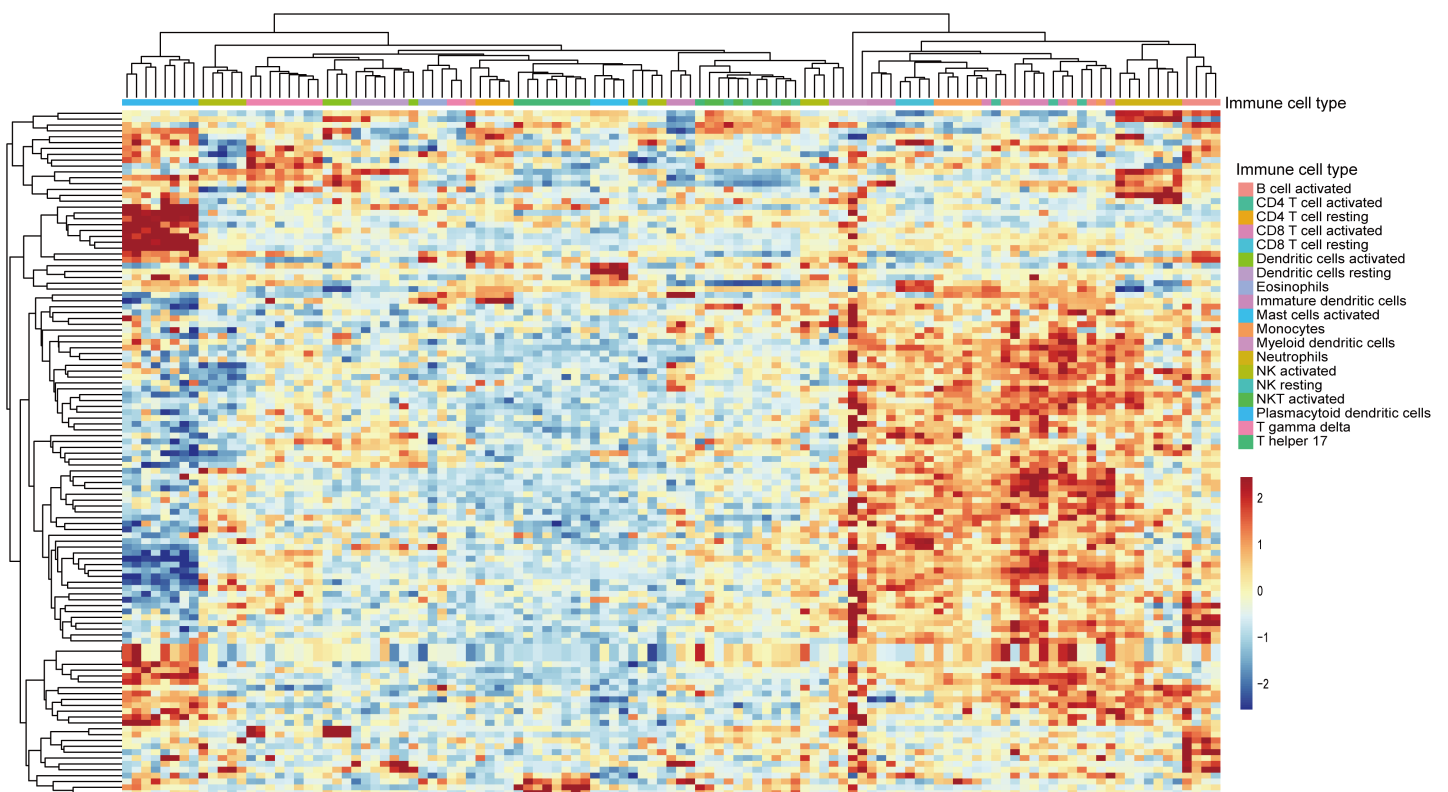

Supplement: jitc-2019-000110supp002.pdf [file jitc-2019-000110supp002.pdf]

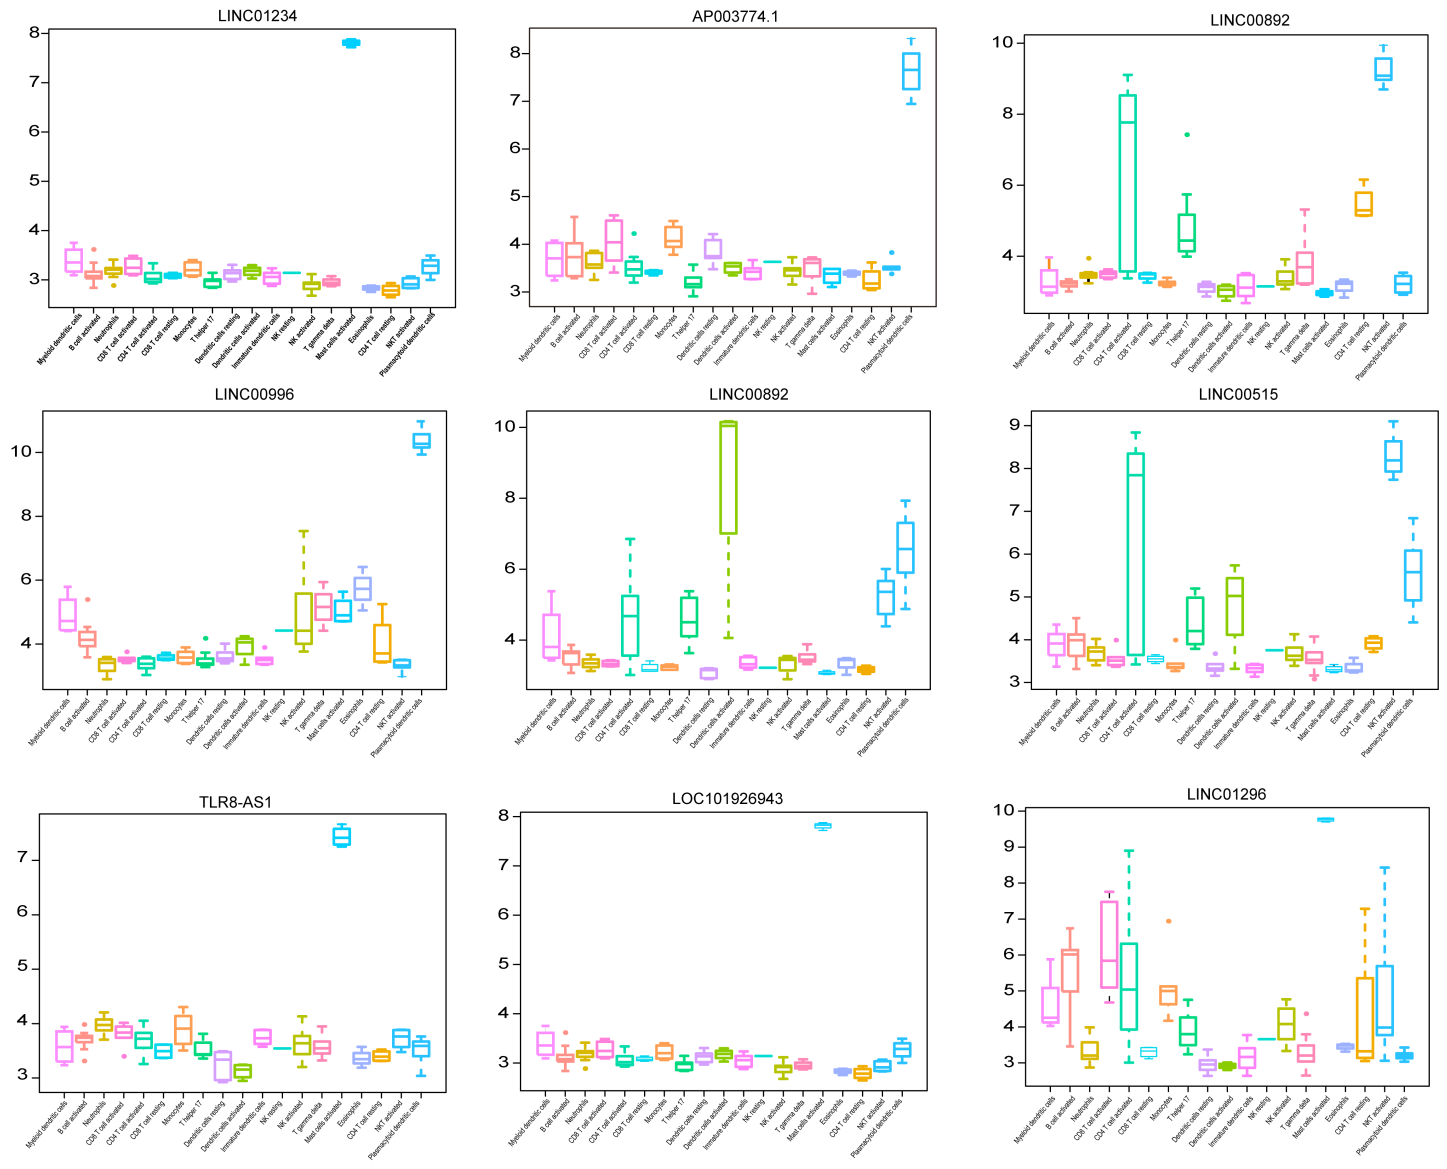

Supplement: jitc-2019-000110supp004.pdf [file jitc-2019-000110supp004.pdf]

A

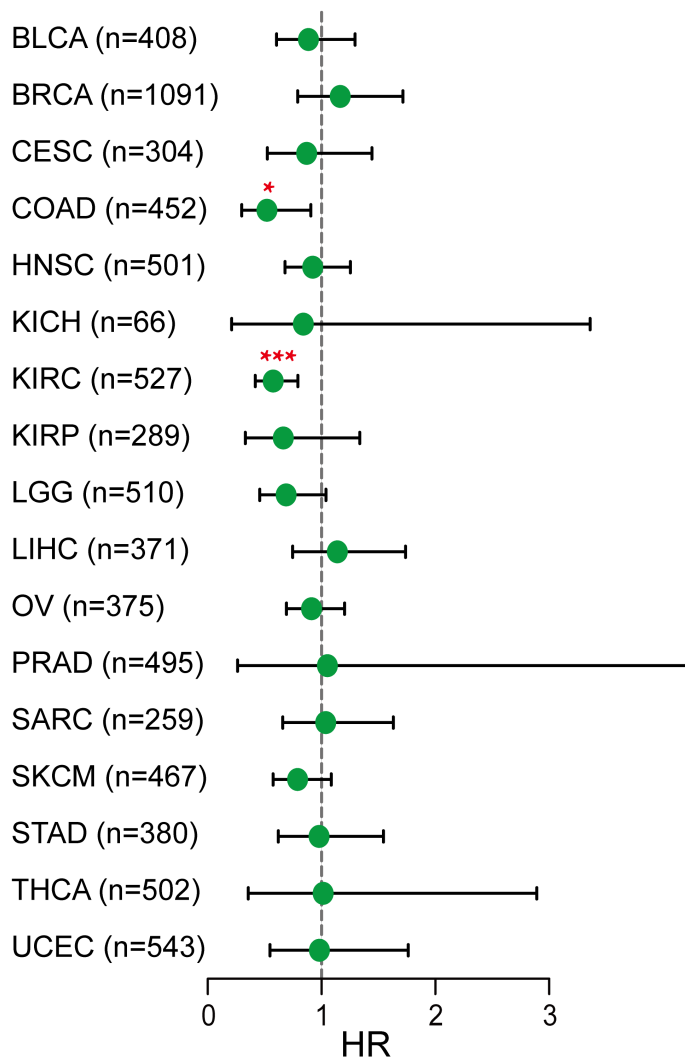

B

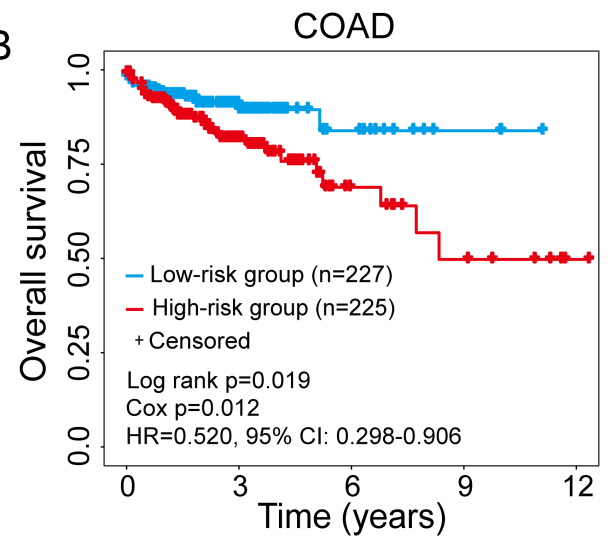

C

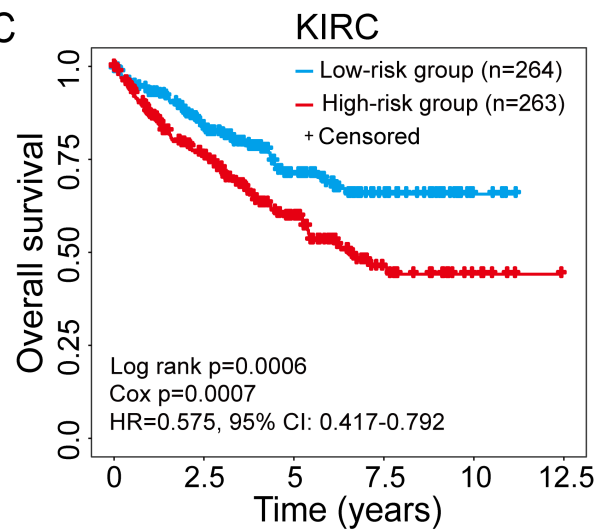

Supplement: jitc-2019-000110supp006.pdf [file jitc-2019-000110supp006.pdf]

## Enriched GO-BP terms

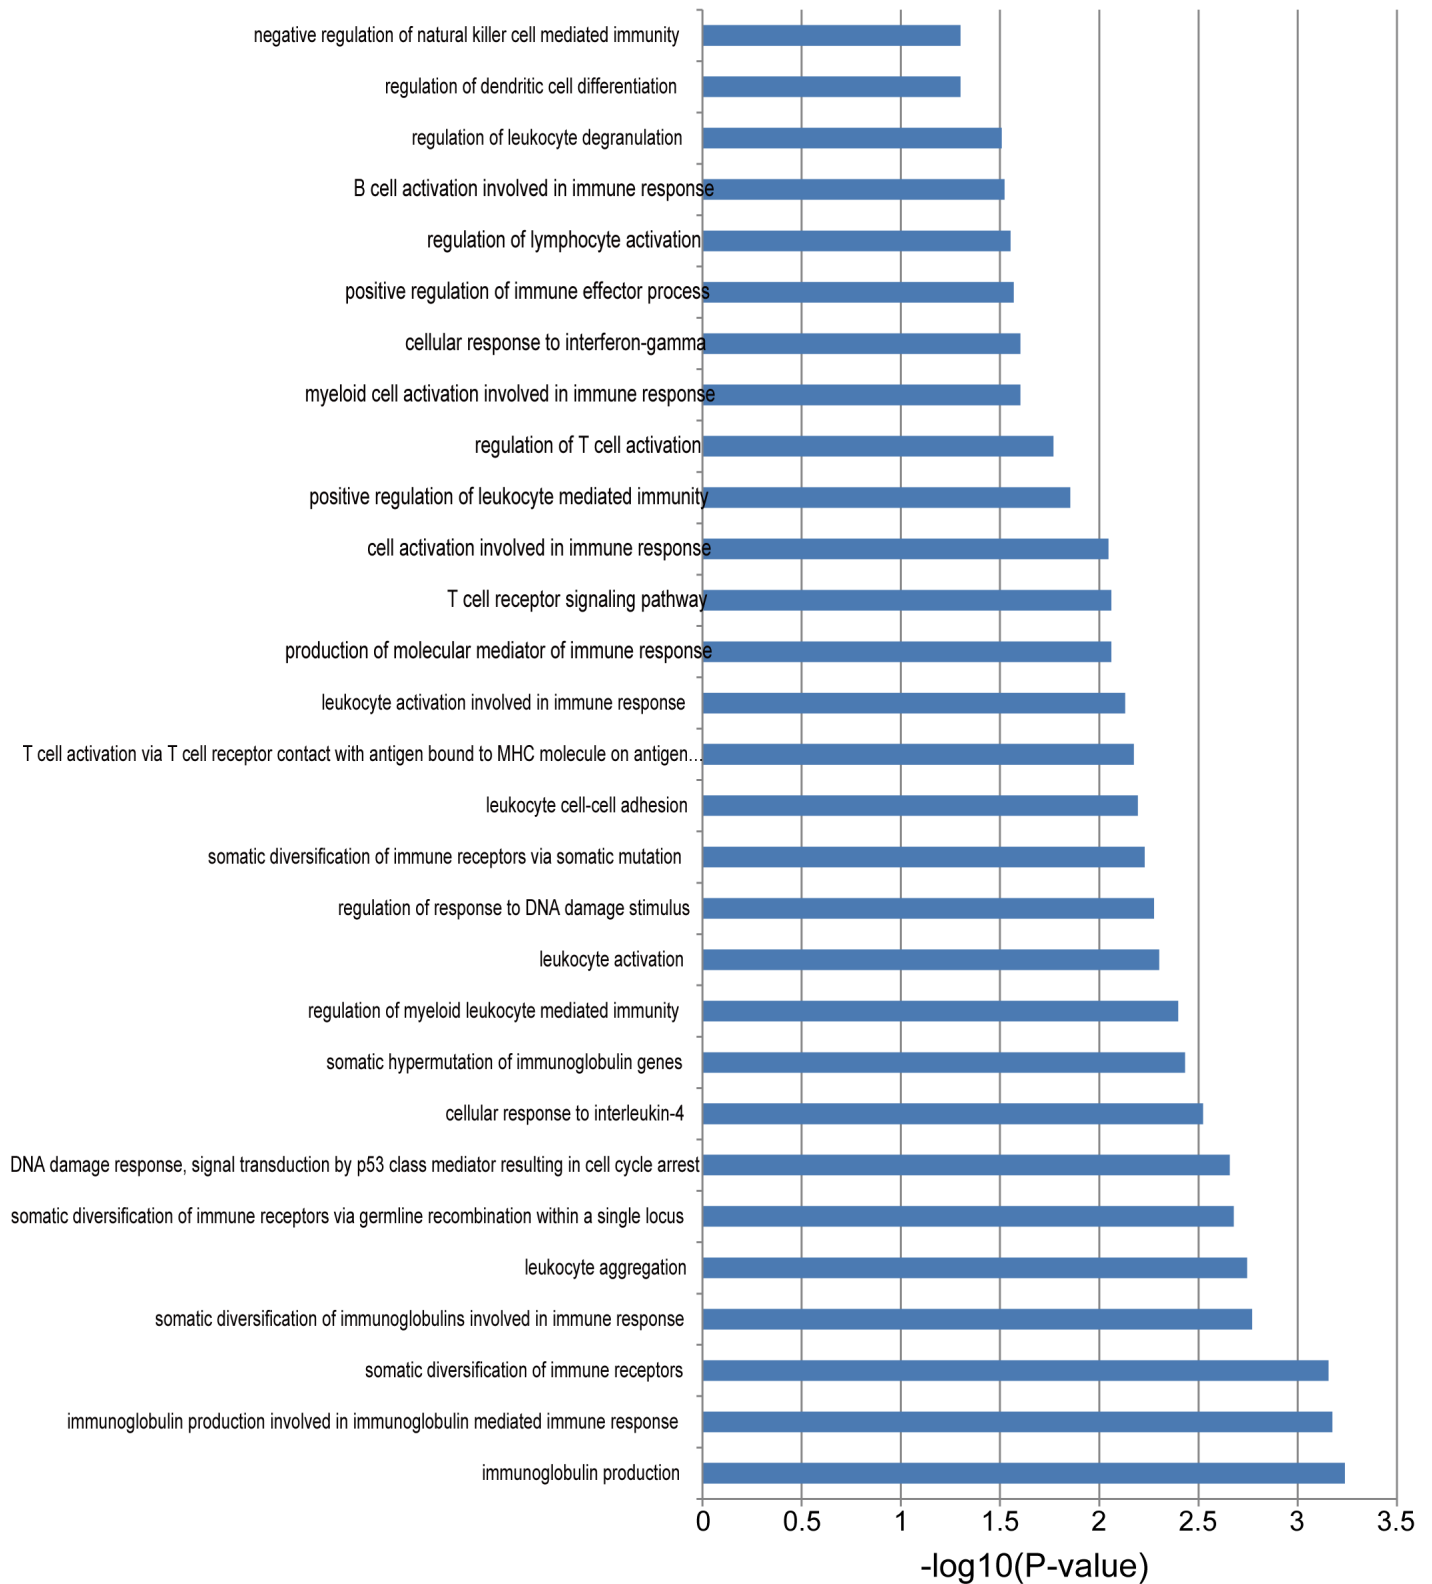

Supplement: jitc-2019-000110supp007.pdf [file jitc-2019-000110supp007.pdf]
